# Supplementary material
Source: ML conference proceedings conference paper supplement (https://proceedings.mlr.press/v124/xia20a.html)
Supplement: Supplementary file [file xia20a-supp.pdf]

## 8 Appendix: Proofs

**Lemma 4.** *Suppose  $\Lambda$  is a deterministic uniformly least favorable distribution for composite vs. simple test ( $H_0$  vs.  $h_1$ ) under  $\mathcal{M} = (\mathcal{S}, \Theta, \bar{\pi})$ . Then for any  $n \in \mathbb{N}$ ,  $\Lambda$  is also a uniformly least favorable distribution for testing  $H_0$  vs.  $h_1$  under  $\mathcal{M} = (\mathcal{S}^n, \Theta, \bar{\pi})$  with  $n$  i.i.d. samples.*

*Proof:* Let  $\text{Spt}(\Lambda) = \{h_0^*\}$ . For any  $n \in \mathbb{N}$  and any  $h_0 \in H_0$ , we define a random variable  $X_{n,h_0} : \mathcal{S}^n \rightarrow \mathbb{R}$ , where for any  $P_n \in \mathcal{S}^n$ ,  $\Pr(P_n) = \pi_{h_0}(P_n) = \prod_{V \in P_n} \pi_{h_0}(V)$ , and  $X_{n,h_0}(P_n) = \log \text{Ratio}_{h_0^*, h_1}$ . It follows that

$$X_{n,h_0} = \underbrace{X_{h_0} + X_{h_0} + \cdots + X_{h_0}}_n$$

By Lemma 3, for any  $h_0 \in H_0$ ,  $X_{h_0^*}$  weakly dominates  $X_{h_0}$ . Because first-order stochastic dominance is preserved under convolution [Deelstra and Plantin, 2014], we have that  $X_{n,h_0^*}$  weakly dominates  $X_{n,h_0}$ . The lemma follows after applying Lemma 3.  $\square$

**Remarks.** Lemma 4 is an extension of Theorem 2.3 by Reinhardt Reinhardt [1961] to finite models. Reinhardt's theorem requires that for any constant  $t$ , with measure 0 we have  $\pi_{h_0^*}(P) = t\pi_{h_1}(P)$ . This is an important assumption in Reinhardt's proof because it assumes away cases with  $\text{Ratio}(P) = k_\alpha$  so that the most powerful test is deterministic. Unfortunately, this assumption does not hold for finite models and we must deal with randomized tests.

**Lemma 5** *Under a Mallows' model, for any  $\varphi$ , any  $K \in \mathbb{N}$ , any  $a \in \mathcal{A}$ , any  $W \in \mathcal{L}(\mathcal{A})$ , and any  $C', C \subseteq \mathcal{A}$  such that  $C$  dominates  $C'$  w.r.t.  $W$ , we have  $\pi_W(\{P : w_P(C' \succ a) \geq K\}) \leq \pi_W(\{P : w_P(C \succ a) \geq K\})$ .*

*Proof:* We first prove the lemma for a special case where  $C$  and  $C'$  differ in only one alternative, that is,  $|C - C'| = 1$ . Let  $c \in C$  such that  $c \notin C'$ . Let  $c' \in C'$  such that  $c' \notin C$ . Because  $C$  dominates  $C'$  in  $W$ , we have  $c \succ_W c'$ .

Let  $\mathcal{P} = \{P \in \mathcal{L}(\mathcal{A}) : w_P(C \succ a) \geq K\}$  and  $\mathcal{P}' = \{P \in \mathcal{L}(\mathcal{A}) : w_P(C' \succ a) \geq K\}$ . We define the following permutation  $\mathcal{M}$  over  $\mathcal{L}(\mathcal{A})$ . For any  $P \in \mathcal{L}(\mathcal{A})$ , if  $c \succ_P a \succ_P c'$  then  $\mathcal{M}(P)$  is the ranking that is obtained from  $P$  by switching  $c$  and  $c'$ ; otherwise  $\mathcal{M}(P) = P$ . Because  $|C - C'| = 1$ , it follows that for any  $P \in \mathcal{P} - \mathcal{P}'$ , we must have  $c \succ_P a \succ_P c'$  and  $(C - C') \succ_P a$ . Therefore,  $\mathcal{M}(\mathcal{P} - \mathcal{P}') = \mathcal{P}' - \mathcal{P}$ .

We now prove that  $\pi_W(\mathcal{P} - \mathcal{P}') > \pi_W(\mathcal{P}' - \mathcal{P})$ . For any  $P \in \mathcal{P} - \mathcal{P}'$ , we have  $c \succ_P a \succ_P c'$ , which means that  $\pi_W(P) \geq \pi_W(\mathcal{M}(P))/\varphi$  because  $c \succ_W c'$ . Therefore,  $\pi_W(\mathcal{P} - \mathcal{P}') > \pi_W(\mathcal{P}' - \mathcal{P})$  because  $\mathcal{M}(\mathcal{P} - \mathcal{P}') = \mathcal{P}' - \mathcal{P}$ .

We have  $\pi_W(\mathcal{P}) = \pi_W(\mathcal{P} \cap \mathcal{P}') + \pi_W(\mathcal{P} - \mathcal{P}') \geq \pi_W(\mathcal{P} \cap \mathcal{P}') + \pi_W(\mathcal{P}' - \mathcal{P}) = \pi_W(\mathcal{P}')$ .

Therefore, the lemma holds for the case where  $|C - C'| = 1$ . For general  $C$  and  $C'$ , because  $C$  dominates  $C'$ , there exists a sequence of sets  $C = C_0, C_1, \dots, C_l = C'$  such that for all  $0 \leq i \leq l - 1$ , (i)  $C_i$  dominates  $C_{i+1}$ ; (ii)  $|C_i - C_{i+1}| = 1$ . It follows that  $\pi_W(\{P : w_P(C \succ a) \geq K\}) \geq \pi_W(\{P : w_P(C_1 \succ a) \geq K\}) \geq \cdots \geq \pi_W(\{P : w_P(C' \succ a) \geq K\})$ .  $\square$

**Theorem 2 (Characterization of all UMP non-winner tests under Mallows).** *Given a Mallows' model  $\mathcal{M}^{Ma}$  with  $m \geq 2$  and  $n \geq 2$ , there exists a UMP test for  $H_0 = L_{a \succ \text{others}}$  vs.  $H_1$  for all  $0 < \alpha < 1$  if and only if there exists  $B \subseteq \mathcal{A}$  such that  $H_1 \subseteq L_{B \succ a}$ .*

*Moreover, when  $H_1 \subseteq L_{B \succ a}$ ,  $f_{\alpha, a, B}$  defined in Theorem 1 is a UMP test.*

*Proof:* The “if” part. We note that  $f_{\alpha, a, B}$  does not depend on the orderings among alternatives in  $B$  in  $h_1$ . It follows that for all  $h_1 \in H_1$ ,  $f_{\alpha, a, B}$  is a level- $\alpha$  most powerful test for  $H_0$  vs.  $\{h_1\}$ , which means that  $f_{\alpha, a, B}$  is a UMP test.

The “only if” part. Suppose there exist  $B, B'$  such that  $B \neq B'$  and there exist two rankings  $h_1^1 = [B \succ a \succ \text{others}]$  and  $h_1^2 = [B' \succ a \succ \text{others}]$  in  $H_1$ . W.l.o.g. suppose  $B' - B \neq \emptyset$ . Let  $\alpha$  denote the number such that  $K_\alpha = n|B| - 0.5$ ,  $\Gamma_\alpha = 0$ , and let  $f_{\alpha, a, B}$  denote the most powerful test for  $H_0$  vs.  $h_1^1$  guaranteed by Theorem 1. Because  $K_\alpha$  is not an integer, there does not exist  $P_n$  such that  $w_{P_n}(B \succ a) = K_\alpha$ . This means that  $f_{\alpha, a, B}$  is the unique most powerful level- $\alpha$  test for  $H_0$  vs.  $h_1^1$ . We observe that for any  $P_n$ ,  $f_{\alpha, a, B}(P_n)$  is either 0 or 1, and  $f_{\alpha, a, B}(P_n) = 1$  if and only if  $a$  is ranked below  $B$  in all  $n$  rankings in  $P_n$ . It follows that  $f_{\alpha, a, B}$  must be the unique level- $\alpha$  UMP test for  $H_0$  vs.  $H_1$ .

By Theorem 1, any most powerful level- $\alpha$  test, in particular  $f_{\alpha,a,B}$ , must agree with  $f_{\alpha,a,B'}$  except for the threshold cases  $w_{P_n}(B' \succ a) = K'_\alpha$  for some  $K'_\alpha$ . Choose arbitrary  $b' \in B' - B$  and  $b \in B$ . Let  $P_n^*$  be composed of  $n$  copies of  $[B \succ a \succ \text{others}]$  and let  $P'_n$  be composed of  $n - 1$  copies of  $[b' \succ B \succ a \succ \text{others}]$  and one copy of  $[b' \succ (B - \{b\}) \succ a \succ \text{others}]$ . Because  $w_{P_n^*}(B \succ a) = n|B| > K_\alpha$ , we have  $f_{\alpha,a,B}(P_n^*) = 1$ . This means that the threshold  $K'_\alpha$  for  $f_{\alpha,a,B'}$  is no more than  $w_{P_n^*}(B' \succ a) = n|B \cap B'|$ . Because  $n \geq 2$ , we have  $w_{P'_n}(B' \succ a) \geq n(|B \cap B'| + 1) - 1 > n|B \cap B'| = w_{P_n^*}(B' \succ a)$ , which means that  $f_{\alpha,a,B}(P'_n) = 1$ . However,  $w_{P'_n}(B \succ a) = n|B| - 1 < n|B|$ , which is a contradiction because for any profile  $P_n$ ,  $f_{\alpha,a,B}(P_n) = 1$  if and only if  $B \succ a$  in all  $n$  rankings in  $P_n$ .  $\square$

**Theorem 4.** Let  $\mathcal{M}^{\text{Ma}}$  denote a Mallows' model with  $n = 1$ , any  $m \geq 4$ , and any  $\varphi < 1/m$ . There exists  $0 < \alpha < 1$  such that no level- $\alpha$  UMP test exists for  $H_0 = (\mathcal{L}(\mathcal{A}) - H_1)$  vs.  $H_1 = L_{a \succ \text{others}}$ .

*Proof:* By Lemma 10, if a UMP test exists then  $\bar{f}_{\alpha,a}$  is also a UMP test. Therefore, it suffices to prove that  $\bar{f}_{\alpha,a}$  is not a level- $\alpha$  UMP test. To this end, we explicitly construct a test  $f$  and prove that the rankings assigned value 1 are more cost-effective than that under  $\bar{f}_{\alpha,a}$ .

Let  $V_1, V_2, \dots, V_m, V'_2 \in \mathcal{L}(\mathcal{A})$  denote  $m + 1$  rankings defined as follows. For any  $j \leq m$ , let  $V_j = [a_j \succ \text{others}]$ , where alternatives in "others" are ranked w.r.t. the increasing order of their subscripts. In other words,  $V_j$  is obtained from  $V_1$  by raising alternative  $a_j$  to the top position. We let  $V'_3 = [a_3 \succ a_1 \succ a_4 \succ a_2 \succ \text{others}]$ .

We consider the following critical function  $f$ . For any  $V \in \mathcal{L}_{a \succ \text{others}}$ , we let  $f(V) = 1$ . For any  $V_j$  with  $j \neq 3$ , let  $f(V_j) = 1$ . We then let  $f(V_3) = f(V'_3) = \frac{1+\varphi^m}{1+\varphi}$ . Let  $\alpha$  denote the size of  $f$  at  $V_2$ . That is,  $\alpha = \text{Size}(f, V_2)$ . Let  $T = \pi_{V_2}(\mathcal{L}_{a \succ \text{others}})$ . It follows that

$$\begin{aligned} & \alpha - T \\ & \propto \varphi^0 + \frac{1 + \varphi^m}{1 + \varphi} (\varphi^{\text{KT}(V_2, V_3)} + \varphi^{\text{KT}(V_2, V'_3)}) + \sum_{j=5}^m \varphi^{\text{KT}(V_2, V_j)} \\ & = 1 + \frac{1 + \varphi^m}{1 + \varphi} (\varphi^3 + \varphi^4) + \varphi^4 + \sum_{j=5}^m \varphi^{\text{KT}(V_2, V_j)} \\ & > 1 + \varphi^3 + \varphi^4 + \varphi^5 \end{aligned}$$

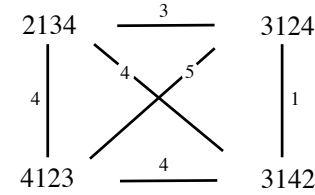

Figure 1: Kentall-Tau distance for some rankings over four alternatives.

For any  $j, j^* \geq 2$  such that  $j \neq j^*$ , it is not hard to verify that  $\text{KT}(V_j, V_{j^*}) = j + j^* - 2$ . Moreover,  $\text{KT}(V_3, V'_3) = 1$ ,  $\text{KT}(V_2, V'_3) = 4$ ,  $\text{KT}(V_4, V'_3) = 4$ , and for any  $j \geq 5$ , we have  $\text{KT}(V'_3, V_j) = j + 2$ . Therefore, we have the following calculations of  $\text{Size}(f, V_3)$ ,  $\text{Size}(f, V'_3)$ , and  $\text{Size}(f, V_4)$  (see Figure 1 for distances between  $V_2, V_3, V'_3, V_4$ ). We note that  $T = \pi_{V_2}(\mathcal{L}_{a \succ \text{others}}) = \pi_{V_3}(\mathcal{L}_{a \succ \text{others}}) = \pi_{V'_3}(\mathcal{L}_{a \succ \text{others}}) = \pi_{V_4}(\mathcal{L}_{a \succ \text{others}})$  due to symmetry.

$$\text{Size}(f, V_3) - T \propto \varphi^3 + \frac{1+\varphi^m}{1+\varphi} (1 + \varphi) + \varphi^5 + \sum_{j=5}^m \varphi^{\text{KT}(V_3, V_j)} \leq 1 + \varphi^3 + (m - 3)\varphi^5$$

$$\text{Size}(f, V'_3) - T \propto \varphi^4 + \frac{1+\varphi^m}{1+\varphi} (1 + \varphi) + \varphi^4 + \sum_{j=5}^m \varphi^{\text{KT}(V'_3, V_j)} \leq 1 + 2\varphi^4 + (m - 4)\varphi^6$$

$$\text{Size}(f, V_4) - T \propto \varphi^4 + \frac{1+\varphi^m}{1+\varphi} (\varphi^4 + \varphi^5) + 1 + \sum_{j=5}^m \varphi^{\text{KT}(V_4, V_j)} \leq 1 + 2\varphi^4 + (m - 4)\varphi^7$$

For any other  $h'_0 \in H_0$ , we have  $\text{Size}(f, h'_0) - T \leq m\varphi$ . Because  $\varphi < 1/m$ , we have  $\text{Size}(f) = \alpha$ . Let  $P$  denote a profile that is composed of  $\{V_2, V_4, \dots, V_m\} \cup \frac{1+\varphi^m}{1+\varphi} \{V_3, V'_3\}$ . We next prove that  $\text{Ratio}_{V_2, V_1}(P) > \text{Ratio}_{V_2, V_1}(T_{m-2})$ .

Let  $Z_m = \prod_{l=1}^m \frac{1-\varphi^m}{1-\varphi}$  denote the Mallows normalization factor for  $m$  alternatives. We have

$$\begin{aligned} \text{Ratio}_{V_2, V_1}(T_{m-2}) &= \frac{\pi_{V_1}(T_{m-2})}{\pi_{V_2}(T_{m-2})} \\ &= \frac{\varphi Z_{m-1}}{Z_{m-2} + \varphi^2(Z_{m-1} - Z_{m-2})} \\ &= \frac{\varphi \frac{Z_{m-1}}{Z_{m-2}}}{1 + \varphi^2 \left( \frac{Z_{m-1}}{Z_{m-2}} - 1 \right)} = \frac{\varphi + \varphi^2 + \dots + \varphi^{m-1}}{1 + \varphi^3 + \varphi^4 + \dots + \varphi^m} < \frac{1}{\varphi} \end{aligned}$$

$$\begin{aligned} \text{Ratio}_{V_2, V_1}(P) &= \frac{\varphi + \varphi^2 + \dots + \varphi^{m-1} + \varphi^{m+2}}{1 + \varphi^3 + \varphi^4 + \dots + \varphi^m + \varphi^{m+3}} \\ &> \frac{\varphi + \varphi^2 + \dots + \varphi^{m-1}}{1 + \varphi^3 + \varphi^4 + \dots + \varphi^m} \\ &= \text{Ratio}_{V_2, V_1}(T_{m-2}) \end{aligned}$$

We note that  $\text{Size}(\bar{f}_{\alpha, a}, V_2) = \alpha$ . This means that  $\text{Power}(\bar{f}_{\alpha, a}, V_1) = \pi_{V_1}(T_{m-1}) + \alpha \text{Ratio}_{T_2, T_1}(T_{m-2}) < \pi_{V_1}(T_{m-1}) + \alpha \text{Ratio}_{T_2, T_1}(P) = \text{Power}(f, V_1)$ . This means that  $\bar{f}_{\alpha, a}$  is not a level- $\alpha$  UMP. The theorem follows after Lemma 10.  $\square$

**Theorem 5.** Let  $\mathcal{M}^{\text{Ma}}$  denote a Mallows' model with  $n = 1$  and any  $m \geq 4$ . There exists  $\epsilon > 0$  such that for any  $\varphi > 1 - \epsilon$  and any  $\alpha$ ,  $\bar{f}_{\alpha, a}$  is a UMP test for  $H_0 = (\mathcal{L}(\mathcal{A}) - H_1)$  vs.  $H_1 = L_{a \succ \text{others}}$ .

*Proof:* We first verify that when  $K_\alpha = m - 1$ ,  $\bar{f}_{\alpha, a}$  is a UMP test. For any  $h_1 \in H_1$ , let  $h_0^* \in H_0$  denote the ranking that is obtained from  $h_1$  by moving  $a$  down for one position. It is not hard to check that for any  $V \in \mathcal{L}(\mathcal{A})$ ,  $\text{Ratio}_{h_0^*, h_1}(V) \leq 1/\varphi$ , and for all  $V \in H_1$  we have  $\text{Ratio}_{h_0^*, h_1}(V) = 1/\varphi$ . This means that for any level- $\alpha$  test for  $H_0$  vs.  $h_1$ , the power cannot be more than  $\alpha/\varphi$ . We note that  $\bar{f}_{\alpha, a}$  is a level- $\alpha$  test whose power is exactly  $\alpha/\varphi$ . This means that for all  $h_1 \in H_1$ ,  $\bar{f}_{\alpha, a}$  is a most powerful test for  $H_0$  vs.  $h_1$ . Therefore, when  $K_\alpha = m - 1$ ,  $\bar{f}_{\alpha, a}$  is a UMP test.

For any  $\alpha$  such that  $K_\alpha \leq m - 2$ , we will prove that for any  $h_1 \in H_1$ ,  $\bar{f}_{\alpha, a}$  is a most powerful level- $\alpha$  test for  $H_0$  vs.  $h_1$ . This is done in the following steps. Step 1. Find a least favorable distribution  $\Lambda_\alpha^{h_1}$  whose support is the set of all rankings where  $a$  is ranked at the second position. Step 2. Verify that  $\bar{f}_{\alpha, a}$  is the likelihood ratio test w.r.t.  $\Lambda_\alpha^{h_1}$ , and step 3. verify that the two conditions in Lemma 2 holds for  $\Lambda_\alpha^{h_1}$ .

**Step 1.** The main challenge is that in general there does not exist a uniformly least favorable distribution. For different  $\alpha$  we define different  $\Lambda_\alpha^{h_1}$  as follows. For any  $\alpha$ , we let  $s_\alpha$  denote the smallest Borda score of the ranking  $V$  such that  $\bar{f}_{\alpha, a}(V) > 0$ . We have that  $s_\alpha \leq m - 2$ . Let the support of  $\Lambda_\alpha^{h_1}$  be  $T_{m-2}$ , which is the set of rankings where  $a$  is ranked at the second position. We will solve the following system of linear equations to determine  $\Lambda_\alpha^{h_1}$ . For any  $h_0^* \in T_{m-2}$  there is a variable  $x[h_0, s_\alpha]$ .

$$\forall V \in T_{s_\alpha}, \sum_{h_0^* \in T_{m-2}} \text{Ratio}_{h_0^*, h_1}^{-1}(V) \cdot x[h_0^*, s_\alpha] = m \quad (\text{LP}_{s_\alpha}^{h_1})$$

We note that as  $\varphi \rightarrow 1$ ,  $\text{Ratio}_{h_0^*, h_1}^{-1}(V) = \frac{\pi_{h_0^*}(V)}{\pi_{h_1}(V)} = \varphi^{\text{KT}(h_0^*, V) - \text{KT}(h_1, V)} \rightarrow 1$ . Because there are  $m$  variables and  $m$  equations, as  $\varphi \rightarrow 1$  the solution to  $\text{LP}_{s_\alpha}^{h_1}$  converges to  $\vec{1}$ . Therefore, there exists  $\epsilon > 0$  such that for all  $\varphi > 1 - \epsilon$ , the linear systems  $\{\text{LP}_s^{h_1} : s \leq m - 1, h_1 \in H_1\}$  all have strictly positive solutions. Let  $\{x^*[h_0^*, s_\alpha] | V \in T_{s_\alpha}\}$  denote a solution to  $\text{LP}_{s_\alpha}^{h_1}$ . For any  $h_0^* \in T_{m-2}$ , we let  $\Lambda_\alpha^{h_1}(h_0^*) = \frac{x^*[h_0^*, s_\alpha]}{\sum_{h_0 \in T_{m-2}} x^*[h_0, s_\alpha]}$ .

**Step 2.** To simplify notation we let  $\text{LR}_\alpha = \text{LR}_{\alpha, \Lambda_\alpha^{h_1}, h_1}$  denote the likelihood ratio test and let  $\text{Ratio} = \text{Ratio}_{\Lambda_\alpha^{h_1}, h_1}$  denote the likelihood ratio function w.r.t. distribution  $\Lambda_\alpha^{h_1}$  for  $H_0$  vs.  $h_1$ . To prove  $\text{LR}_\alpha = \bar{f}_{\alpha, a}$ , we first prove that for any  $V \in \mathcal{L}(\mathcal{A})$  where  $a$  is not ranked at the bottom position,  $\text{Ratio}(V) > \text{Ratio}(\text{Down}_a^1(V))$ , where we recall that

$\text{Down}_a^1(V)$  is the ranking obtained from  $V$  by moving  $a$  down for one position.

$$\begin{aligned}
& \frac{\sum_{h_0^* \in T_{m-2}} \Lambda_\alpha^{h_1}(h_0^*) \cdot \pi_{h_0^*}(\text{Down}_a^1(V))}{\sum_{h_0^* \in T_{m-2}} \Lambda_\alpha^{h_1}(h_0^*) \cdot \pi_{h_0^*}(V)} \\
&= \frac{\sum_{h_0^* \in T_{m-2}} \Lambda_\alpha^{h_1}(h_0^*) \cdot \varphi^{\text{KT}(h_0^*, \text{Down}_a^1(V))}}{\sum_{h_0^* \in T_{m-2}} \Lambda_\alpha^{h_1}(h_0^*) \cdot \varphi^{\text{KT}(h_0^*, V)}} \\
&> \frac{\sum_{h_0^* \in T_{m-2}} \Lambda_\alpha^{h_1}(h_0^*) \cdot \varphi^{\text{KT}(h_0^*, V)} \cdot \varphi^{\text{KT}(V, \text{Down}_a^1(V))}}{\sum_{h_0^* \in T_{m-2}} \Lambda_\alpha^{h_1}(h_0^*) \cdot \varphi^{\text{KT}(h_0^*, V)}} \\
&= \varphi = \frac{\pi_{h_1}(\text{Down}_a^1(V))}{\pi_{h_1}(V)}
\end{aligned}$$

The strict inequality holds because of (1) triangle inequality for Kentall-Tau distance, and (2) for any ranking  $V$  where the top-ranked alternative in  $h_0^*$  is ranked right below  $a$ , we have  $\text{KT}(h_0^*, V) + \text{KT}(V, \text{Down}_a^1(V)) > \text{KT}(h_0^*, \text{Down}_a^1(V))$ , and (3) for all  $h_0^* \in T_{m-2}$ ,  $\Lambda_\alpha^{h_1}(h_0^*) > 0$ .

It follows from the strict inequality that

$$\begin{aligned}
\text{Ratio}(V) &= \frac{\pi_{h_1}(V)}{\sum_{h_0^* \in T_{m-2}} \Lambda_\alpha^{h_1}(h_0^*) \cdot \pi_{h_0^*}(V)} \\
&> \frac{\pi_{h_1}(\text{Down}_a^1(V))}{\sum_{h_0^* \in T_{m-2}} \Lambda_\alpha^{h_1}(h_0^*) \cdot \pi_{h_0^*}(\text{Down}_a^1(V))} \\
&= \text{Ratio}(\text{Down}_a^1(V))
\end{aligned}$$

Moreover, for any  $V, V' \in T_{s_\alpha}$  we have  $\text{Ratio}(V) = \text{Ratio}(V')$  by verifying  $\text{LP}_{s_\alpha}^{h_1}$ . Therefore, for any  $V \in T_i$  with  $i < s_\alpha$ , we can move up the position of  $a$  one by one until we reach the  $(m - s_\alpha)$ -th position. Let  $V^* \in T_{s_\alpha}$  denote this ranking. It follows that  $\text{Ratio}(V) < \text{Ratio}(V^*)$ . Similarly for any  $V' \in T_i$  with  $i > s_\alpha$  we have  $\text{Ratio}(V') > \text{Ratio}(V^*)$  for any  $V^* \in T_{s_\alpha}$ . This means that for any  $V$  where  $a$  is ranked above the  $(m - s_\alpha)$ -th position, we have  $\text{LR}_\alpha(V) = 1$ ; for any  $V$  where  $a$  is ranked below the  $(m - s_\alpha)$ -th position, we have  $\text{LR}_\alpha(V) = 0$ ; for any  $V$  where  $a$  is ranked at the  $(m - s_\alpha)$ -th position, we have that  $\text{LR}_\alpha(V)$  is the same and is between 0 and 1. It follows that  $\text{LR}_\alpha = \bar{f}_{\alpha, a}$ .

**Step 3.** Due to the symmetry  $f_{\alpha, a}$  among alternatives in  $\mathcal{A} - \{a\}$ , for any  $i \leq m - 2$  and any  $h_0, h_0' \in T_i$ , we have  $\text{Size}(\bar{f}_{\alpha, a}, h_0) = \text{Size}(\bar{f}_{\alpha, a}, h_0')$ . Therefore, condition (i) in Lemma 2 is satisfied. Choose arbitrary  $h_0^{m-2} \in T_{m-2}$ . For any  $i \leq m - 3$ , let  $h_0^i \in T_i$  denote the ranking obtained from  $h_0^{i+1}$  by moving  $a$  down for one position. To verify condition (ii) in Lemma 2, it suffices to prove that for any  $i \leq m - 3$  and any  $K \in \mathbb{N}$ , we have

$$\begin{aligned}
& \pi_{h_0^{m-2}}(\{V : \text{Borda}_a(V) \geq K\}) \\
& \geq \pi_{h_0^i}(\{V : \text{Borda}_a(V) \geq K\})
\end{aligned} \tag{2}$$

We will prove a slightly stronger lemma.

**Lemma 8** *Under Mallows' model, for any  $m$ , any  $\varphi$ , any  $W \in \mathcal{L}(\mathcal{A})$ , any  $b, c \in \mathcal{A}$  such that  $b \succ_W c$ , and any  $K$ , we have  $\pi_W(\{V : \text{Borda}_b(V) \geq K\}) \geq \pi_W(\{V : \text{Borda}_c(V) \geq K\})$ .*

*Proof:* The proof is similar to the proof of Lemma 5. It suffices to prove the lemma for the case where  $b$  and  $c$  are adjacent in  $W$ . Let  $\mathcal{P} = \{V \in \mathcal{L}(\mathcal{A}) : \text{Borda}_b(V) \geq K\}$  and  $\mathcal{P}' = \{V \in \mathcal{L}(\mathcal{A}) : \text{Borda}_c(V) \geq K\}$ . It follows that  $\mathcal{P} \cap \mathcal{P}'$  is the set of rankings where both  $b$  and  $c$  are ranked within top  $m - K$  positions;  $\mathcal{P} - \mathcal{P}'$  is the set of rankings where  $b$  is ranked within top  $m - K$  positions but  $c$  is not; and  $\mathcal{P}' - \mathcal{P}$  is the set of rankings where  $c$  is ranked within top  $m - K$  positions but  $b$  is not. We let  $\mathcal{M}$  be a permutation that switches  $b$  and  $c$ . It is not hard to check that  $\mathcal{M}$  is a bijection between  $(\mathcal{P} - \mathcal{P}')$  and  $(\mathcal{P}' - \mathcal{P})$ , and because  $b$  and  $c$  are adjacent in  $W$ , for any  $V \in \mathcal{P}$ , we have  $\text{KT}(\mathcal{M}(V), W) = \text{KT}(V, W) + 1$ , which means that  $\pi_W(V) = \pi(\mathcal{M}(V))/\varphi$ . Therefore, we have

$$\begin{aligned}
& \pi_W(\{V : \text{Borda}_b(V) \geq K\}) - \pi_W(\{V : \text{Borda}_c(V) \geq K\}) \\
&= \pi_W(\mathcal{P}) - \pi_W(\mathcal{P}') = \pi_W(\mathcal{P} - \mathcal{P}') - \pi_W(\mathcal{P}' - \mathcal{P}) \\
&= \pi_W(\mathcal{P} - \mathcal{P}') - \pi_W(M(\mathcal{P} - \mathcal{P}')) \\
&= \left(\frac{1}{\varphi} - 1\right)\pi_W(\mathcal{P} - \mathcal{P}') \geq 0
\end{aligned}$$

This proves the lemma.  $\square$

Let  $W$  be an arbitrary ranking and let  $M_i$  denote a permutation such that  $M_i(h_0^i) = W$ . We have  $\pi_{h_0^i}(\{V : \text{Borda}_a(V) \geq K\}) = \pi_{M_i(h_0^i)}(\{V : \text{Borda}_{M_i(a)}(V) \geq K\})$ . We note that  $M_i(a)$  is the alternative that is ranked at the  $(m - i)$ -th position in  $W$ . Inequality (2) follows after applying Lemma 8. This means that condition (ii) in Lemma 2 is also satisfied. Therefore, by Lemma 2,  $\bar{f}_{\alpha,a}$  is a level- $\alpha$  most powerful test for  $H_0$  vs.  $h_1$ . Since  $\bar{f}_{\alpha,a}$  does not depend on  $h_1$ , it is a level- $\alpha$  UMP test for  $H_0$  vs.  $H_1$ .  $\square$

**Lemma 6.** For any  $\mathcal{M}_X$  and  $\mathcal{M}_Y$ , suppose  $\Lambda_X$  is a least favorable distribution for composite vs. simple test ( $H_{0,X}$  vs.  $x_1$ ) under  $\mathcal{M}_X$ . Given  $y_1 \in \Theta_Y$ , let  $\Lambda^*$  be the distribution over  $H_{0,X} \times \Theta_Y$  where for all  $x \in H_{0,X}$ ,  $\Lambda^*(x, y_1) = \Lambda_X(x)$ . Then  $\Lambda^*$  is a least favorable distribution for  $H_{0,X} \times \Theta_Y$  vs.  $(x_1, y_1)$  under  $\mathcal{M}_X \otimes \mathcal{M}_Y$ .

*Proof:* Let  $x_0^1, \dots, x_0^K \in \Theta_X$  denote the support of  $\Lambda_X$ . The theorem is proved by applying Lemma 2. For any  $0 < \alpha < 1$  and any  $P = (P_X, P_Y) \in \mathcal{S}_X \times \mathcal{S}_Y$ , we have the following calculation. In this proof Ratio stands for  $\text{Ratio}_{\Lambda^*, (x_1, y_1)}$  and  $\text{LR}_\alpha$  stands for  $\text{LR}_{\alpha, \Lambda^*, (x_1, y_1)}$ .

$$\begin{aligned}
\text{Ratio}(P_X, P_Y) &= \frac{\pi_{x_1, y_1}(P)}{\sum_{k=1}^K \Lambda^*(x_0^k, y_1) \pi_{(x_0^k, y_1)}(P)} \\
&= \frac{\pi_{x_1}(P_X) \cdot \pi_{y_1}(P_Y)}{\sum_{k=1}^K \Lambda^*(x_0^k, y_1) \pi_{x_0^k}(P_X) \cdot \pi_{y_1}(P_Y)} \\
&= \frac{\pi_{x_1}(P_X)}{\sum_{k=1}^K \Lambda(x_0^k) \pi_{x_0^k}(P_X)} = \text{Ratio}_{\Lambda, x_1}(P_X)
\end{aligned}$$

It follows that for any pair of samples  $(P_X, P_Y), (P'_X, P'_Y) \in \mathcal{S}_X \times \mathcal{S}_Y$ ,  $\text{Ratio}(P_X, P_Y) \geq \text{Ratio}(P'_X, P'_Y)$  if and only if  $\text{Ratio}_{\Lambda, x_1}(P_X) \geq \text{Ratio}_{\Lambda, x_1}(P'_X)$ . This means that for any  $(P_X, P_Y)$ ,  $\text{LR}_\alpha(P_X, P_Y) = \text{LR}_{\alpha, \Lambda, x_1}(P_X)$ . Therefore, for any  $x_0 \in H_{0,X}$ , we have

$$\begin{aligned}
& \text{Size}(\text{LR}_\alpha, (x_0, y_1)) \\
&= \sum_{(P_X, P_Y) \in \mathcal{S}_X \times \mathcal{S}_Y} \pi_{x_0}(P_X) \pi_{y_1}(P_Y) \text{LR}_\alpha(P_X, P_Y) \\
&= \sum_{(P_X, P_Y) \in \mathcal{S}_X \times \mathcal{S}_Y} \pi_{x_0}(P_X) \pi_{y_1}(P_Y) \text{LR}_{\alpha, \Lambda, x_1}(P_X) \\
&= \sum_{P_X \in \mathcal{S}_X} \pi_{x_0}(P_X) \text{LR}_{\alpha, \Lambda, x_1}(P_X) \\
&= \text{Size}(\text{LR}_{\alpha, \Lambda, x_1}, x_0)
\end{aligned}$$

Therefore, by Lemma 2, for any  $(x_0^*, y_1) \in \text{Spt}(\Lambda^*)$ , we have  $\text{Size}(\text{LR}_\alpha, (x_0, y_1)) = \text{Size}(\text{LR}_{\alpha, \Lambda, x_1}, x_0) = \alpha$  because  $x_0^* \in \text{Spt}(\Lambda)$ ; for any  $(x_0, y) \in H_{0,X} \times \Theta_Y$ , we have  $\text{Size}(\text{LR}_\alpha, (x_0, y)) = \text{Size}(\text{LR}_{\alpha, \Lambda, x_1}, x_0) \leq \alpha$ . This means that the two conditions in Lemma 2 are satisfied, which proves the theorem.  $\square$

**Lemma 7.** For any model  $\mathcal{M}_X$  and any  $t \in \mathbb{N}$ , suppose  $\Lambda$  is a uniformly least favorable distribution for composite vs. simple test ( $H_0$  vs.  $h_1$ ) under  $\mathcal{M}_X$ . Then  $\text{Ext}(\Lambda, h_1, t)$  is a uniformly least favorable distribution for  $\text{Ext}(H_0, h_1, t)$  vs.  $\vec{h}_1$  in  $(\mathcal{M}_X)^t$ .

*Proof:* Again the proof is done by applying Lemma 2. We first prove a claim that characterizes samples whose likelihood ratio is no more than a given threshold. To this end, it is convenient to use the inverse of the likelihood ratio. To simplify notation, in this proof we let  $\Lambda^* = \text{Ext}(\Lambda, h_1, t)$ , let  $H_0^* = \text{Ext}(H_0, h_1, t)$ , let  $\text{LR}_\alpha = \text{LR}_{\alpha, \Lambda^*, \bar{h}_1}$ ,  $\text{Ratio} = \text{Ratio}_{\Lambda^*, \bar{h}_1}$ .

**Claim 1** For any  $k_\alpha$  and any  $\vec{x} \in \mathcal{S}^t$ ,  $\sum_{j=1}^t \text{Ratio}_{\Lambda, h_1}^{-1}(x_j) = t \cdot \text{Ratio}^{-1}(\vec{x})$ .

$$\begin{aligned} \text{Proof: we have } \text{Ratio}^{-1}(\vec{x}) &= \frac{1}{t} \cdot \frac{\sum_{j=1}^t \sum_{h_0 \in H_0} \Lambda(h_0) \cdot \pi_{(h_0, [\bar{h}_1]_{-j})}(\vec{x})}{\pi_{\bar{h}_1}(\vec{x})} \\ &= \frac{1}{t} \cdot \frac{\sum_{j=1}^t \sum_{h_0 \in H_0} \Lambda(h_0) \cdot \pi_{h_0}(x_j) \cdot \pi_{[\bar{h}_1]_{-j}}(x_j)}{\pi_{h_1}(x_j) \cdot \pi_{[\bar{h}_1]_{-j}}(x_j)} \\ &= \frac{1}{t} \sum_{j=1}^t \text{Ratio}_{\Lambda, h_1}^{-1}(x_j) \end{aligned} \quad \square$$

The next lemma proves the following: For any  $\vec{z} \in H_0^*$  and any  $j \leq t$ , suppose the  $j$ -th component is not in  $\text{Spt}(\Lambda) \cup \{h_1\}$ . If we fix all components except  $j$ -th in  $\vec{z}$  and change the  $j$ -th component to  $h_0^* \in \text{Spt}(\Lambda)$ , then the size of  $\text{LR}_\alpha$  will increase. If we further change the  $j$ -th component to  $h_1$ , then the size of  $\text{LR}_\alpha$  will further increase.

**Lemma 9** For any  $0 \leq \alpha \leq 1$ , any  $j \leq t$ , any  $\vec{z}_{-j} \in \Theta^{t-1}$ , any  $h_0 \in H_0$ , and any  $h_0^* \in \text{Spt}(\Lambda)$ , we have  $\text{Size}(\text{LR}_\alpha, (h_0, \vec{z}_{-j})) \leq \text{Size}(\text{LR}_\alpha, (h_0^*, \vec{z}_{-j})) \leq \text{Size}(\text{LR}_\alpha, (h_1, \vec{z}_{-j}))$ .

*Proof:* For any  $\vec{z}_{-j} \in \Theta^{n-1}$ , we have

$$\begin{aligned} \text{Size}(\text{LR}_\alpha, (h_0, \vec{z}_{-j})) &= \pi_{(h_0, \vec{z}_{-j})}(\{\vec{x} \in \mathcal{S}^t : \text{Ratio}(\vec{x}) > k_\alpha^*\}) \\ &\quad + \gamma_\alpha^* \pi_{(h_0, \vec{z}_{-j})}(\{\vec{x} \in \mathcal{S}^t : \text{Ratio}(\vec{x}) = k_\alpha^*\}) \end{aligned}$$

For any  $\vec{x}$ , we let  $\text{Sum}(\vec{x}) = \sum_{l=1}^t \text{Ratio}_{\Lambda, h_1}^{-1}(x_l)$  and for any  $j \leq t$ , we let  $\text{Sum}(\vec{x}_{-j}) = \sum_{l \neq j} \text{Ratio}_{\Lambda, h_1}^{-1}(x_l)$ . By Claim 1, we have

$$\begin{aligned} &\pi_{(h_0, \vec{z}_{-j})}(\{\vec{x} \in \mathcal{S}^t : \text{Ratio}(\vec{x}) > k_\alpha^*\}) \\ &= \pi_{(h_0, \vec{z}_{-j})}(\{\vec{x} \in \mathcal{S}^t : \text{Sum}(\vec{x}) < t/k_\alpha^*\}) \\ &= \pi_{(h_0, \vec{z}_{-j})}(\{\vec{x} \in \mathcal{S}^t : \text{Sum}(\vec{x}_{-j}) + \text{Ratio}_{\Lambda, h_1}^{-1}(x_j) < t/k_\alpha^*\}) \\ &= \int_0^{t/k_\alpha^*} \sum_{\vec{x}_{-j} \in \mathcal{S}^{t-1} : \text{Sum}(\vec{x}_{-j}) = p} \pi_{(h_0, \vec{z}_{-j})}(\vec{x}) dp \\ &\quad \sum_{x_j : \text{Ratio}_{\Lambda, h_1}^{-1}(x_j) < t/k_\alpha^* - p} \pi_{(h_0, \vec{z}_{-j})}(\vec{x}) dp \\ &= \int_0^{t/k_\alpha^*} \pi_{\vec{z}_{-j}}(\{\vec{x}_{-j} \in \mathcal{S}^{t-1} : \text{Sum}(\vec{x}_{-j}) = p\}) \\ &\quad \cdot \pi_{h_0}(\{x_j : \text{Ratio}_{\Lambda, h_1}^{-1}(x_j) < t/k_\alpha^* - p\}) dp \\ &= \int_0^{t/k_\alpha^*} Q(\vec{z}_{-j}, p) \cdot \pi_{h_0}(\{x_j : \text{Ratio}_{\Lambda, h_1}^{-1}(x_j) < t/k_\alpha^* - p\}) dp \end{aligned}$$

where  $Q(\vec{z}_{-j}, p) = \pi_{\vec{z}_{-j}}(\{\vec{x}_{-j} \in \mathcal{S}^{t-1} : \text{Sum}(\vec{x}_{-j}) = p\})$ . Given  $p$  and  $\gamma_\alpha^*$ , let  $\alpha'$  denote the size of the likelihood ratio test  $\text{LR}_{\alpha', \Lambda, h_1}$ , where the threshold  $k_{\alpha'}$  is  $1/(t/k_\alpha^* - p)$  and  $\gamma_{\alpha'} = \gamma_\alpha^*$ . We have

$$\text{Size}(\text{LR}_\alpha, (h_0, \vec{z}_{-j})) = \int_0^{t/k_\alpha^*} Q(\vec{z}_{-j}, p) \cdot \text{Size}(\text{LR}_{\alpha', \Lambda, h_1}, h_0) dp \quad (3)$$

We note that in Equation (3),  $\alpha'$  is a function of  $t$ ,  $p$ ,  $k_\alpha^*$ , and  $\gamma_\alpha^*$ . Because  $\Lambda$  is a uniformly least favorable distribution, it follows from Lemma 2 that for any  $h_0^* \in \text{Spt}(\Lambda)$  and any  $h_0 \in (H_0 - \text{Spt}(\Lambda))$ , we have

$$\text{Size}(\text{LR}_{\alpha', \Lambda, h_1}, h_0) \leq \alpha' \leq \text{Size}(\text{LR}_{\alpha', \Lambda, h_1}, h_0^*)$$

Then by Equation (3), for any  $h_0 \in (H_0 - \text{Spt}(\Lambda))$  and any  $h_0^* \in \text{Spt}(\Lambda)$ , we have

$$\begin{aligned}
& \text{Size}(\text{LR}_\alpha, (h_0, \bar{z}_{-j})) \\
&= \int_0^{t/k_\alpha^*} Q(\bar{z}_{-j}, p) \cdot \text{Size}(\text{LR}_{\alpha', \Lambda, h_1}, h_0) dp \\
&\leq \int_0^{t/k_\alpha^*} Q(\bar{z}_{-j}, p) \cdot \text{Size}(\text{LR}_{\alpha', \Lambda, h_1}, h_0^*) dp \\
&= \text{Size}(\text{LR}_\alpha, (h_0^*, \bar{z}_{-j}))
\end{aligned}$$

To prove the last inequality in the lemma, we prove a claim that holds for any least favorable distribution and the corresponding likelihood ratio test. The  $\text{Size}(\cdot)$  function in the claim is extended to  $h_1 \in H_1$  in the natural way.

**Claim 2** For any model, any composite vs. simple test ( $H_0$  vs.  $h_1$ ), suppose  $\Lambda$  is a level- $\eta$  least favorable distribution. Then we have  $\text{Size}(\text{LR}_\eta, h_1) \geq \eta = \text{Size}(\text{LR}_\eta, h_0^\Lambda)$ .<sup>4</sup>

*Proof:* For the sake of contradiction suppose this is not true, that is, for any  $h_0^* \in \text{Spt}(\Lambda)$  we have  $\text{Size}(\text{LR}_\eta, h_1) < \eta = \text{Size}(\text{LR}_\eta, h_0^*)$ . It follows that  $k_\eta \leq 1$ , otherwise we have

$$\begin{aligned}
& \text{Size}(\text{LR}_\eta, h_1) \\
&= \sum_{P \in \mathcal{S}: \text{Ratio}(P) > k_\eta} \pi_{h_1}(P) + \gamma_\eta \sum_{P \in \mathcal{S}: \text{Ratio}(P) = k_\eta} \pi_{h_1}(P) \\
&\geq \sum_{P \in \mathcal{S}: \text{Ratio}(P) > k_\eta} \pi_\Lambda(P) \cdot k_\eta + \gamma_\eta \sum_{P \in \mathcal{S}: \text{Ratio}(P) = k_\eta} \pi_\Lambda(P) \cdot k_\eta \\
&> \sum_{P \in \mathcal{S}: \text{Ratio}(P) > k_\eta} \pi_\Lambda(P) + \gamma_\eta \sum_{P \in \mathcal{S}: \text{Ratio}(P) = k_\eta} \pi_\Lambda(P) = \eta,
\end{aligned}$$

which is a contradiction. Therefore, we have

$$\begin{aligned}
& 1 \\
&= \text{Size}(\text{LR}_\eta, h_1) + \sum_{P \in \mathcal{S}: \text{Ratio}(P) < k_\eta} \pi_{h_1}(P) \\
&\quad + (1 - \gamma_\eta) \sum_{P \in \mathcal{S}: \text{Ratio}(P) = k_\eta} \pi_{h_1}(P) \\
&< \eta + \sum_{P \in \mathcal{S}: \text{Ratio}(P) < k_\eta} \pi_\Lambda(P) \cdot k_\eta \\
&\quad + (1 - \gamma_\eta) \sum_{P \in \mathcal{S}: \text{Ratio}(P) = k_\eta} \pi_\Lambda(P) \cdot k_\eta \\
&\leq \eta + k_\eta(1 - \text{Size}(\text{LR}_\eta, h_0^\Lambda)) \leq 1,
\end{aligned}$$

which is a contradiction. □

Applying Claim 2 to  $\text{LR}_{\alpha', \Lambda, h_1}$ , we have

$$\begin{aligned}
& \text{Size}(\text{LR}_\alpha, (h_0^*, \bar{z}_{-j})) \\
&= \int_0^{t/k_\alpha^*} Q(\bar{z}_{-j}, p) \cdot \text{Size}(\text{LR}_{\alpha', \Lambda, h_1}, h_0^*) dp \\
&\leq \int_0^{t/k_\alpha^*} Q(\bar{z}_{-j}, p) \cdot \text{Size}(\text{LR}_{\alpha', \Lambda, h_1}, h_1) dp \\
&= \text{Size}(\text{LR}_\alpha, (h_1, \bar{z}_{-j}))
\end{aligned}$$

<sup>4</sup>We recall that  $h_0^\Lambda$  is the combined  $H_0$  by  $\Lambda$ .

This finishes the proof of Lemma 9.  $\square$

It follows from Lemma 9 that for any  $j \leq t$  and any  $h_0^* \in \text{Spt}(\Lambda)$ , we have that  $\text{Size}(\text{LR}_\alpha, (h_0^*, [\vec{h}_1]_{-j}))$  is the same. Due to symmetry, for any  $\vec{h}_0^* \in H_0^*$ ,  $\text{Size}(\text{LR}_\alpha, h_0^*)$  is the same and is therefore equivalent to  $\alpha$ . This verifies condition (i) in Lemma 2.

Condition (ii) in Lemma 2 is verified by recursively applying Lemma 9. Given any  $\vec{h}_0 \in H_0^* - \text{Spt}(\Lambda^*)$ , there must exist  $j \leq t$  such that  $[\vec{h}_0]_j \neq h_1$ . We then change  $[\vec{h}_0]_j$  to an arbitrary  $h_0^* \in \text{Spt}(\Lambda)$ , then change the other components of  $\vec{h}_0$  to  $h_1$  one by one. Each time we make the change the size of  $\text{LR}_\alpha$  does not decrease according to Lemma 9. At the end of the process we obtain  $(h_0^*, [\vec{h}_1]_j) \in \text{Spt}(\Lambda^*)$ , at which the size of  $\text{LR}_\alpha$  is  $\alpha$ . The theorem follows after applying Lemma 2.  $\square$

We now define a test  $\bar{f}_{\alpha,a}$  for  $H_0 = (\mathcal{L}(\mathcal{A}) - H_1)$  vs.  $H_1 = L_{\alpha > \text{others}}$  and prove that if a UMP test exists, then  $\bar{f}_{\alpha,a}$  must also be a UMP test. For any  $V \in \mathcal{L}(\mathcal{A})$  and any alternative  $a \in \mathcal{A}$ , we let  $\text{Borda}_a(V)$  denote the Borda score of  $a$  in  $V$ . That is,  $\text{Borda}_a(V)$  is the number of alternatives that are ranked below  $a$  in  $V$ . For any  $V \in \mathcal{L}(\mathcal{A})$ , we let

$$\bar{f}_{\alpha,a}(V) = \begin{cases} 1 & \text{if } \text{Borda}_a(V) > K_\alpha \\ 0 & \text{if } \text{Borda}_a(V) < K_\alpha \\ \Gamma_\alpha & \text{if } \text{Borda}_a(V) = K_\alpha \end{cases}, \text{ where } K_\alpha \text{ and } \Gamma_\alpha \text{ are chosen so that the size of } \bar{f}_{\alpha,a} \text{ is } \alpha. \text{ In other words,}$$

$\bar{f}_{\alpha,a}$  calculates the Borda score of  $a$  in the input profile, and if it is larger than a threshold  $K_\alpha$  then  $H_0$  is rejected. It is not hard to see that  $\bar{f}_{\alpha,a}$  equals to  $f_{\alpha',a}$  with a possibly different level  $\alpha'$  (defined in Theorem 3).

**Lemma 10** *If there exists a level- $\alpha$  UMP test for  $H_0 = (\mathcal{L}(\mathcal{A}) - H_1)$  vs.  $H_1 = L_{\alpha > \text{others}}$ , then  $\bar{f}_{\alpha,a}$  is also a level- $\alpha$  UMP test.*

*Proof:* Let  $f_\alpha$  denote a level- $\alpha$  UMP test. For any permutation  $M$  over  $\mathcal{A} - \{a\}$ , we let  $M(f_\alpha)$  denote the test such that for any  $V \in \mathcal{L}(\mathcal{A})$ ,  $M(f_\alpha)(V) = f_\alpha(M(V))$ . Because the Kendall-Tau distance is invariant to permutations, we have that for any  $h_0 \in H_0$ ,  $\text{Size}(f_\alpha, h_0) = \text{Size}(M(f_\alpha), M(h_0))$ , and for any  $h_1 \in H_1$ ,  $\text{Power}(f_\alpha, h_1) = \text{Power}(M(f_\alpha), M(h_1))$ . Therefore  $\text{Size}(M(f_\alpha)) = \alpha$ . Also because the multi-set of  $\{\text{Power}(f_\alpha, h_1) : h_1 \in H_1\}$  is the same as the multi-set  $\{\text{Power}(M(f_\alpha), h_1) : h_1 \in H_1\}$ , for all  $h_1 \in H_1$ , we must have  $\text{Power}(f_\alpha, h_1) = \text{Power}(M(f_\alpha), h_1)$ , otherwise there exists  $h_1 \in H_1$  such that  $\text{Power}(f_\alpha, h_1) < \text{Power}(M(f_\alpha), h_1)$ , which contradicts the assumption that  $f_\alpha$  is UMP.

It follows that for any permutation  $M$  over  $\mathcal{A} - \{a\}$ ,  $M(f_\alpha)$  is also UMP. Therefore,  $\bar{f}_\alpha = \frac{1}{(m-1)!} \sum_M M(f_\alpha)$  is also UMP. We note that for any  $V, V'$  where  $a$  has the same Borda score, there exists a permutation  $M$  over  $\mathcal{A} - \{a\}$  so that  $M(V) = V'$ . This means that  $\bar{f}_\alpha(V) = \bar{f}_\alpha(V')$ .

We now prove that  $\bar{f}_\alpha$  must be  $\bar{f}_{\alpha,a}$  as in the statement of the Lemma. More precisely, we will prove that for any  $V, V'$  such that  $\text{Borda}_a(V) > \text{Borda}_a(V')$ , if  $\bar{f}_\alpha(V') > 0$  then  $\bar{f}_\alpha(V) = 1$ . Suppose for the sake of contradiction that this is not true, and there exist  $V, V'$  such that  $s_1 = \text{Borda}_a(V) > \text{Borda}_a(V') = s_2$ ,  $\bar{f}_\alpha(V') > 0$ , and  $\bar{f}_\alpha(V) < 1$ . For any  $s \leq m - 1$ , we let  $T_s$  denote the set of rankings where the Borda score of  $a$  is  $s$ . That is,  $T_s = \{V \in \mathcal{L}(\mathcal{A}) : \text{Borda}_a(V) = s\}$ . We will prove that for any  $s_1 > s_2$ ,  $T_{s_1}$  as a whole is more ‘‘cost effective’’ than  $T_{s_2}$  as a whole for any  $h_0 \in H_0$  against any  $h_1 \in H_1$ . More precisely, we will prove that  $\text{Ratio}_{h_0, h_1}(T_{s_1}) > \text{Ratio}_{h_0, h_1}(T_{s_2})$ .

For any  $s \leq m - 2$  and any  $h_0 \in T_s$ , let  $h_1$  denote the ranking in  $T_{m-1} = H_1$  that is obtained from  $\theta$  by raising  $a$  to the top position. For any  $V_{s_1} \in T_{s_1}$ , we let  $\text{Down}_a^{s_1-s_2}(V_{s_1}) \in T_{s_2}$  denote the ranking that is obtained from  $V_{s_1}$  by



moving  $a$  down for  $s_1 - s_2$  positions, that is, from the  $(m - s_1)$ -th position to the  $(m - s_2)$ -th position. We have

$$\begin{aligned}
& \frac{\pi_{h_0}(T_{s_2})}{\pi_{h_0}(T_{s_1})} \\
&= \frac{\sum_{V \in T_{s_2}} \pi_{h_0}(V)}{\sum_{V \in T_{s_1}} \pi_{h_0}(V)} = \frac{\sum_{V \in T_{s_1}} \pi_{h_0}(\text{Down}_a^{s_1 - s_2}(V))}{\sum_{V \in T_{s_1}} \pi_{h_0}(V)} \\
&= \frac{\sum_{V \in T_{s_1}} \varphi^{\text{KT}(h_0, \text{Down}_a^{s_1 - s_2}(V))}}{\sum_{V \in T_{s_1}} \varphi^{\text{KT}(h_0, V)}} \\
&> \frac{\sum_{V \in T_{s_1}} \varphi^{\text{KT}(h_0, V)} \cdot \varphi^{\text{KT}(V, \text{Down}_a^{s_1 - s_2}(V))}}{\sum_{V \in T_{s_1}} \varphi^{\text{KT}(h_0, V)}} \\
&= \varphi^{s_1 - s_2} = \frac{\pi_{h_1}(T_{s_2})}{\pi_{h_1}(T_{s_1})}
\end{aligned}$$

The inequality is due to triangle inequality for Kendall-Tau distance. It is strict because for any  $V \in T_{s_1}$  where the top-ranked alternative in  $h_0$  is ranked between the  $(m - s_1)$ -th and  $(m - s_2)$ -th position,  $\text{KT}(h_0, \text{Down}_a^{s_1 - s_2}(V)) < \text{KT}(h_0, V) + \text{KT}(V, \text{Down}_a^{s_1 - s_2}(V))$ . Therefore,  $\frac{\pi_{h_0}(T_{s_2})}{\pi_{h_0}(T_{s_1})} > \frac{\pi_{h_1}(T_{s_2})}{\pi_{h_1}(T_{s_1})}$ , which means that  $\text{Ratio}_{h_0, h_1}(T_{s_1}) = \frac{\pi_{h_1}(T_{s_1})}{\pi_{h_0}(T_{s_1})} > \frac{\pi_{h_1}(T_{s_2})}{\pi_{h_0}(T_{s_2})} = \text{Ratio}_{h_0, h_1}(T_{s_2})$ .

Therefore, we can find sufficiently small  $\epsilon, \delta > 0$ , and replace  $\epsilon T_{s_2}$  by  $\delta T_{s_1}$  without changing the size. This will increase the power of  $\bar{f}_\alpha$  because  $T_{s_1}$  is strictly more cost effective than  $T_{s_2}$ , which contradicts the assumption that  $\bar{f}_\alpha$  is a UMP test. Therefore,  $\bar{f}_\alpha = \bar{f}_{\alpha, a}$ , which proves the lemma.  $\square$
